# Supplementary material for: A new family of 1D, 2D and 3D frameworks aggregated from Ni5, Ni4 and Ni7 building units: synthesis, structure, and magnetism
Source: Royal Society of Chemistry journal article supplement (doi:10.1039/c5dt04953a), 2016-01-01
Supplement: c5dt04953a1.pdf [file c5dt04953a1.pdf]

## ELECTRONIC SUPPLEMENTARY INFORMATION FOR

### A New Family of 1D, 2D and 3D Frameworks Aggregated from Ni<sub>5</sub>, Ni<sub>4</sub> and Ni<sub>7</sub> Building Units: Synthesis, Structure, and Magnetism

Ya-hui Liu, Li-ping Lu\*, Miao-li Zhu, Si-si Feng\*, Feng Su

#### The Discussion of Synthesis

Molar ratio: The various molar ratios of reactants (such as 1:2, 2:1, 3:1, 3:2 etc) have been tried in our recipes of synthesis. It turned out that 2:1 molar ratio of metal ion and ligand is the best choice for high purity and yield.

Crystallization methods: Since the H<sub>3</sub>BPT ligand is poorly soluble to obtain crystals at room temperature, we employed solvothermal reactions giving high temperature and autogenous pressure to make the synthesis reaction occur. After attempting different reaction temperature and time, we found that maintaining the reaction at 433 K for 72 h is the best condition for the purity and crystallinity.

Solvents: The synthesis of the complexes was failed by using single solvent, thus we tried different mix-solvents, in which the polarity of each kind of solvents is different. So we speculated that the polarity of the solvent may be an important factor for the reaction.

Auxiliary ligands: We originally chose the auxiliary N-heterocyclic ligands 2,2'-bipy (as terminal ligand) and 1,4-bi(1H-imidazol-1-yl)benzene (as extended ligand), respectively, to control the dimensionality of the complexes **2** and **3**. In the complex **3**, the 1,4-bi(1H-imidazol-1-yl)benzene ligand coordinates with Ni<sup>2+</sup> ions and extends the structure to 3D according to our design. To our surprise, the auxiliary ligand 2,2'-bipy in **2** mainly adjust the reaction process instead of preventing the further interconnection as terminal ligand. In order to study the role of 2,2'-bipy, we replaced it with triethylamine and ensured the same pH conditions before reaction. Then, the obtained crystal is the same to complex **2**. So, the 2,2'-bipy mainly acts as an environmental factor to adjust the deprotonation of H<sub>3</sub>BPT.

**Table S1. Selected Bond Lengths (Å) and Angles (deg) for 1 -3**

|                          |            |                      |           |                         |            |
|--------------------------|------------|----------------------|-----------|-------------------------|------------|
| Complex <b>1</b>         |            |                      |           |                         |            |
| Ni1—O13                  | 2.008(8)   | Ni1—O7               | 2.052(8)  | Ni1—O1                  | 2.090(8)   |
| Ni1—O13 <sup>i</sup>     | 2.008(8)   | Ni1—O7 <sup>i</sup>  | 2.052(8)  | Ni1—O1 <sup>i</sup>     | 2.090(8)   |
| Ni2—O13 <sup>i</sup>     | 2.004(8)   | Ni2—O14              | 2.028(10) | Ni2—O15                 | 2.057(9)   |
| Ni2—O16                  | 2.100(10)  | Ni2—O17              | 2.107(9)  | Ni2—O2                  | 2.116(9)   |
| Ni3—O8                   | 2.019(9)   | Ni3—O4 <sup>ii</sup> | 2.039(9)  | Ni3—O13                 | 2.042(8)   |
| Ni3—O19                  | 2.053(10)  | Ni3—O18              | 2.100(9)  | Ni3—O17 <sup>i</sup>    | 2.126(9)   |
| O13—Ni1—O13 <sup>i</sup> | 179.998(2) | O13—Ni1—O7           | 89.2(3)   | O13—Ni1—O7 <sup>i</sup> | 90.8(3)    |
| O13—Ni1—O1 <sup>i</sup>  | 92.9(3)    | O13—Ni1—O1           | 87.1(3)   | O7—Ni1—O7 <sup>i</sup>  | 179.998(2) |
| O7—Ni1—O1 <sup>i</sup>   | 89.8(3)    | O7—Ni1—O1            | 90.2(3)   | O1—Ni1—O1 <sup>i</sup>  | 179.998(2) |

|                           |          |                           |          |                                        |          |
|---------------------------|----------|---------------------------|----------|----------------------------------------|----------|
| O13 <sup>i</sup> -Ni2-O14 | 175.8(4) | O13 <sup>i</sup> -Ni2-O15 | 93.7(4)  | O13 <sup>i</sup> -Ni2-O16              | 84.9(4)  |
| O13 <sup>i</sup> -Ni2-O17 | 82.0(3)  | O13 <sup>i</sup> -Ni2-O2  | 94.1(3)  | O14-Ni2-O15                            | 89.7(4)  |
| O14-Ni2-O16               | 92.8(4)  | O14-Ni2-O17               | 94.4(4)  | O14-Ni2-O2                             | 88.3(4)  |
| O15-Ni2-O16               | 86.4(4)  | O15-Ni2-O17               | 173.1(4) | O15-Ni2-O2                             | 92.3(4)  |
| O16-Ni2-O17               | 87.8(4)  | O16-Ni2-O2                | 178.3(4) | O17-Ni2-O2                             | 93.4(3)  |
| O8-Ni3-O4 <sup>ii</sup>   | 90.4(4)  | O8-Ni3-O13                | 93.2(3)  | O8-Ni3-O18                             | 90.4(4)  |
| O8-Ni3-O19                | 177.8(4) | O8-Ni3-O17 <sup>i</sup>   | 88.9(4)  | O4 <sup>ii</sup> -Ni3-O13              | 167.6(4) |
| O4 <sup>ii</sup> -Ni3-O19 | 91.7(4)  | O4 <sup>ii</sup> -Ni3-O18 | 94.6(4)  | O4 <sup>ii</sup> -Ni3-O17 <sup>i</sup> | 87.5(3)  |
| O13-Ni3-O18               | 97.3(3)  | O13-Ni3-O19               | 84.6(4)  | O13-Ni3-O17 <sup>i</sup>               | 80.7(3)  |
| O18-Ni3-O17 <sup>i</sup>  | 177.8(3) | O19-Ni3-O18               | 89.9(4)  | O19-Ni3-O17 <sup>i</sup>               | 90.6(3)  |
| Ni2 <sup>i</sup> -O13-Ni1 | 120.5(4) | Ni2 <sup>i</sup> -O13-Ni3 | 101.7(3) | Ni1-O13-Ni3                            | 122.6(4) |
| Ni2-O17-Ni3 <sup>i</sup>  | 95.7(3)  |                           |          |                                        |          |

Symmetry codes: (i)  $-x + 1, -y + 1, -z + 1$ ; (ii)  $-x, -y, -z + 1$ .

### Complex 2

|                                           |            |                                         |            |                           |           |
|-------------------------------------------|------------|-----------------------------------------|------------|---------------------------|-----------|
| Ni1-O1                                    | 2.107(2)   | Ni1-O7                                  | 2.052(2)   | Ni1-O7 <sup>ii</sup>      | 2.044(2)  |
| Ni1-O3 <sup>iii</sup>                     | 2.062(2)   | Ni1-O5 <sup>i</sup>                     | 2.029(2)   | Ni1-O8                    | 2.089(3)  |
| Ni2-O2                                    | 1.996(2)   | Ni2-O7                                  | 2.013(2)   | Ni2-O9                    | 2.108(2)  |
| Ni2-O10                                   | 2.095(2)   | Ni2-O3 <sup>iii</sup>                   | 2.137(2)   | Ni2-O6 <sup>iv</sup>      | 2.039(2)  |
| O5 <sup>i</sup> -Ni1-O7 <sup>ii</sup>     | 99.37(9)   | O5 <sup>i</sup> -Ni1-O7                 | 93.99(9)   | O7 <sup>ii</sup> -Ni1-O7  | 80.87(9)  |
| O5 <sup>i</sup> -Ni1-O3 <sup>iii</sup>    | 163.00(9)  | O7 <sup>ii</sup> -Ni1-O3 <sup>iii</sup> | 96.00(9)   | O7-Ni1-O3 <sup>iii</sup>  | 81.28(9)  |
| O5 <sup>i</sup> -Ni1-O8                   | 90.84(10)  | O7 <sup>ii</sup> -Ni1-O8                | 92.73(10)  | O7-Ni1-O8                 | 172.54(9) |
| O3 <sup>iii</sup> -Ni1-O8                 | 95.66(10)  | O5 <sup>i</sup> -Ni1-O1                 | 80.85(9)   | O7 <sup>ii</sup> -Ni1-O1  | 178.24(9) |
| O7-Ni1-O1                                 | 100.86(9)  | O3 <sup>iii</sup> -Ni1-O1               | 84.01(9)   | O8-Ni1-O1                 | 85.51(10) |
| O2-Ni2-O7                                 | 95.22(9)   | O2-Ni2-O6 <sup>iv</sup>                 | 166.00(10) | O7-Ni2-O6 <sup>iv</sup>   | 98.66(9)  |
| O2-Ni2-O10                                | 82.41(10)  | O7-Ni2-O10                              | 176.58(9)  | O6 <sup>iv</sup> -Ni2-O10 | 83.81(9)  |
| O2-Ni2-O9                                 | 85.52(9)   | O7-Ni2-O9                               | 90.54(9)   | O6 <sup>iv</sup> -Ni2-O9  | 92.46(9)  |
| O10-Ni2-O9                                | 91.72(9)   | O2-Ni2-O3 <sup>iii</sup>                | 91.97(9)   | O7-Ni2-O3 <sup>iii</sup>  | 80.37(9)  |
| O6 <sup>iv</sup> -Ni2-O3 <sup>iii</sup>   | 92.19(9)   | O10-Ni2-O3 <sup>iii</sup>               | 97.22(9)   | O9-Ni2-O3 <sup>iii</sup>  | 170.33(9) |
| Ni2-O7-Ni1 <sup>ii</sup>                  | 120.66(10) | Ni2-O7-Ni1                              | 96.05(9)   | Ni1 <sup>ii</sup> -O7-Ni1 | 99.13(9)  |
| Ni1 <sup>iii</sup> -O3-Ni2 <sup>iii</sup> | 92.06(9)   |                                         |            |                           |           |

Symmetry codes: (i)  $-x, -y, -z + 2$ ; (ii)  $-x+1, -y, -z + 1$ ; (iii)  $-x+1, -y+1, -z + 2$ ; (iv)  $x+1, y, z-1$ ; (v)  $x-1, y, z+1$ ;

### Complex 3

|                                         |           |                                         |           |                                         |           |
|-----------------------------------------|-----------|-----------------------------------------|-----------|-----------------------------------------|-----------|
| Ni1-O1                                  | 2.031(6)  | Ni1-O4 <sup>i</sup>                     | 2.052(7)  | Ni1-N1                                  | 2.059(7)  |
| Ni1-O7                                  | 2.062(6)  | Ni1-O9 <sup>ii</sup>                    | 2.066(6)  | Ni1-O10 <sup>ii</sup>                   | 2.169(6)  |
| Ni2-O9 <sup>ii</sup>                    | 1.993(6)  | Ni2-O8 <sup>iii</sup>                   | 2.020(7)  | Ni2-O2                                  | 2.064(6)  |
| Ni2-N4 <sup>iv</sup>                    | 2.076 (8) | Ni2-O7                                  | 2.093 (6) | Ni2-O11 <sup>i</sup>                    | 2.156 (6) |
| Ni3-O9 <sup>v</sup>                     | 1.992 (7) | Ni3-O9                                  | 1.992 (7) | Ni3-O3 <sup>v</sup>                     | 2.029 (7) |
| Ni3-O3                                  | 2.029 (7) | Ni3-O10 <sup>v</sup>                    | 2.105 (6) | Ni3-O10                                 | 2.105 (6) |
| Ni4-O8 <sup>vi</sup>                    | 2.043 (6) | Ni4-O8                                  | 2.049 (6) | Ni4-O7 <sup>vii</sup>                   | 2.057 (7) |
| Ni4-O6                                  | 2.107 (6) | Ni4-O5                                  | 2.123 (6) | Ni4-O11 <sup>viii</sup>                 | 2.147 (7) |
| O1-Ni1-O4 <sup>i</sup>                  | 89.4 (3)  | O1-Ni1-N1                               | 90.9 (3)  | O4 <sup>i</sup> -Ni1-N1                 | 90.1 (3)  |
| O1-Ni1-O7                               | 93.0 (3)  | O4 <sup>i</sup> -Ni1-O7                 | 173.6 (2) | N1-Ni1-O7                               | 95.8 (3)  |
| O1-Ni1-O9 <sup>ii</sup>                 | 94.5(3)   | O4 <sup>i</sup> -Ni1-O9 <sup>ii</sup>   | 91.7 (2)  | N1-Ni1-O9 <sup>ii</sup>                 | 174.4 (3) |
| O7-Ni1-O9 <sup>ii</sup>                 | 82.2 (2)  | O1-Ni1-O10 <sup>ii</sup>                | 171.4 (2) | O4 <sup>i</sup> -Ni1-O10 <sup>ii</sup>  | 85.6 (3)  |
| N1-Ni1-O10 <sup>ii</sup>                | 96.2 (3)  | O7-Ni1-O10 <sup>ii</sup>                | 91.3 (3)  | O9 <sup>ii</sup> -Ni1-O10 <sup>ii</sup> | 78.7 (2)  |
| O9 <sup>ii</sup> -Ni2-O8 <sup>iii</sup> | 167.2 (3) | O9 <sup>ii</sup> -Ni2-O2                | 89.0 (3)  | O8 <sup>iii</sup> -Ni2-O2               | 94.8 (3)  |
| O9 <sup>ii</sup> -Ni2-N4 <sup>iv</sup>  | 97.5 (3)  | O8 <sup>iii</sup> -Ni2-N4 <sup>iv</sup> | 94.7 (3)  | O2-Ni2-N4 <sup>iv</sup>                 | 90.1 (3)  |
| O9 <sup>ii</sup> -Ni2-O7                | 83.2 (2)  | O8 <sup>iii</sup> -Ni2-O7               | 84.5 (3)  | O2-Ni2-O7                               | 92.2 (2)  |
| N4 <sup>iv</sup> -Ni2-O7                | 177.6 (3) | O9 <sup>ii</sup> -Ni2-O11 <sup>i</sup>  | 95.5 (3)  | O8 <sup>iii</sup> -Ni2-O11 <sup>i</sup> | 80.1 (2)  |
| O2-Ni2-O11 <sup>i</sup>                 | 174.3 (3) | N4 <sup>iv</sup> -Ni2-O11 <sup>i</sup>  | 92.8 (3)  | O7-Ni2-O11 <sup>i</sup>                 | 84.8 (2)  |

|                                            |           |                                           |           |                            |          |
|--------------------------------------------|-----------|-------------------------------------------|-----------|----------------------------|----------|
| O9 <sup>v</sup> -Ni3-O9                    | 180.0 (4) | O9 <sup>v</sup> -Ni3-O3                   | 88.6 (3)  | O9-Ni3-O3                  | 91.4 (3) |
| O9 <sup>v</sup> -Ni3-O3 <sup>v</sup>       | 91.4 (3)  | O9-Ni3-O3 <sup>v</sup>                    | 88.6 (3)  | O3-Ni3-O3 <sup>v</sup>     | 89.5 (4) |
| O9 <sup>v</sup> -Ni3-O10                   | 81.9 (2)  | O9-Ni3-O10 <sup>v</sup>                   | 98.1 (2)  | O3-Ni3-O10 <sup>v</sup>    | 90.6 (3) |
| O3 <sup>v</sup> -Ni3-O10 <sup>v</sup>      | 173.2 (3) | O9 <sup>v</sup> -Ni3-O10                  | 98.1 (2)  | O9-Ni3-O10                 | 81.9 (2) |
| O3-Ni3-O10                                 | 173.2 (3) | O3 <sup>v</sup> -Ni3-O10                  | 90.6 (3)  | O10 <sup>v</sup> -Ni3-O10  | 90.0 (4) |
| O8 <sup>vi</sup> -Ni4-O8                   | 83.7 (3)  | O8 <sup>vi</sup> -Ni4-O7 <sup>vii</sup>   | 84.8 (3)  | O8-Ni4-O7 <sup>vii</sup>   | 92.7 (3) |
| O8 <sup>vi</sup> -Ni4-O6                   | 167.1 (3) | O8-Ni4-O6                                 | 109.2 (3) | O7 <sup>vii</sup> -Ni4-O6  | 93.9 (3) |
| O8 <sup>vi</sup> -Ni4-O5                   | 104.7 (3) | O8-Ni4-O5                                 | 169.5 (3) | O7 <sup>vii</sup> -Ni4-O5  | 94.3 (3) |
| O6-Ni4-O5                                  | 62.6 (3)  | O8 <sup>vi</sup> -Ni4-O11 <sup>viii</sup> | 95.1 (2)  | O8-Ni4-O11 <sup>viii</sup> | 79.6 (2) |
| O7 <sup>vii</sup> -Ni4-O11 <sup>viii</sup> | 172.3 (3) | O6-Ni4-O11 <sup>viii</sup>                | 88.0 (3)  | O5-Ni4-O11 <sup>viii</sup> | 93.2 (3) |

Symmetry codes: (i)  $x, -y + 1, z + 1/2$ ; (ii)  $-x + 1, -y + 1, -z + 1$ ; (iii)  $x - 1/2, y + 1/2, z$ ; (iv)  $x - 1/2, -y + 3/2, z - 1/2$ ; (v)  $-x + 1, y, -z + 1/2$ ; (vi)  $-x + 2, -y + 1, -z + 1$ ; (vii)  $-x + 3/2, -y + 3/2, -z + 1$ ; (viii)  $x + 1/2, -y + 1/2, z + 1/2$ ; (ix)  $x, -y + 1, z - 1/2$ ; (x)  $x + 1/2, y - 1/2, z$ ; (xi)  $x - 1/2, -y + 1/2, z - 1/2$ ; (xii)  $x + 1/2, -y + 3/2, z + 1/2$ .

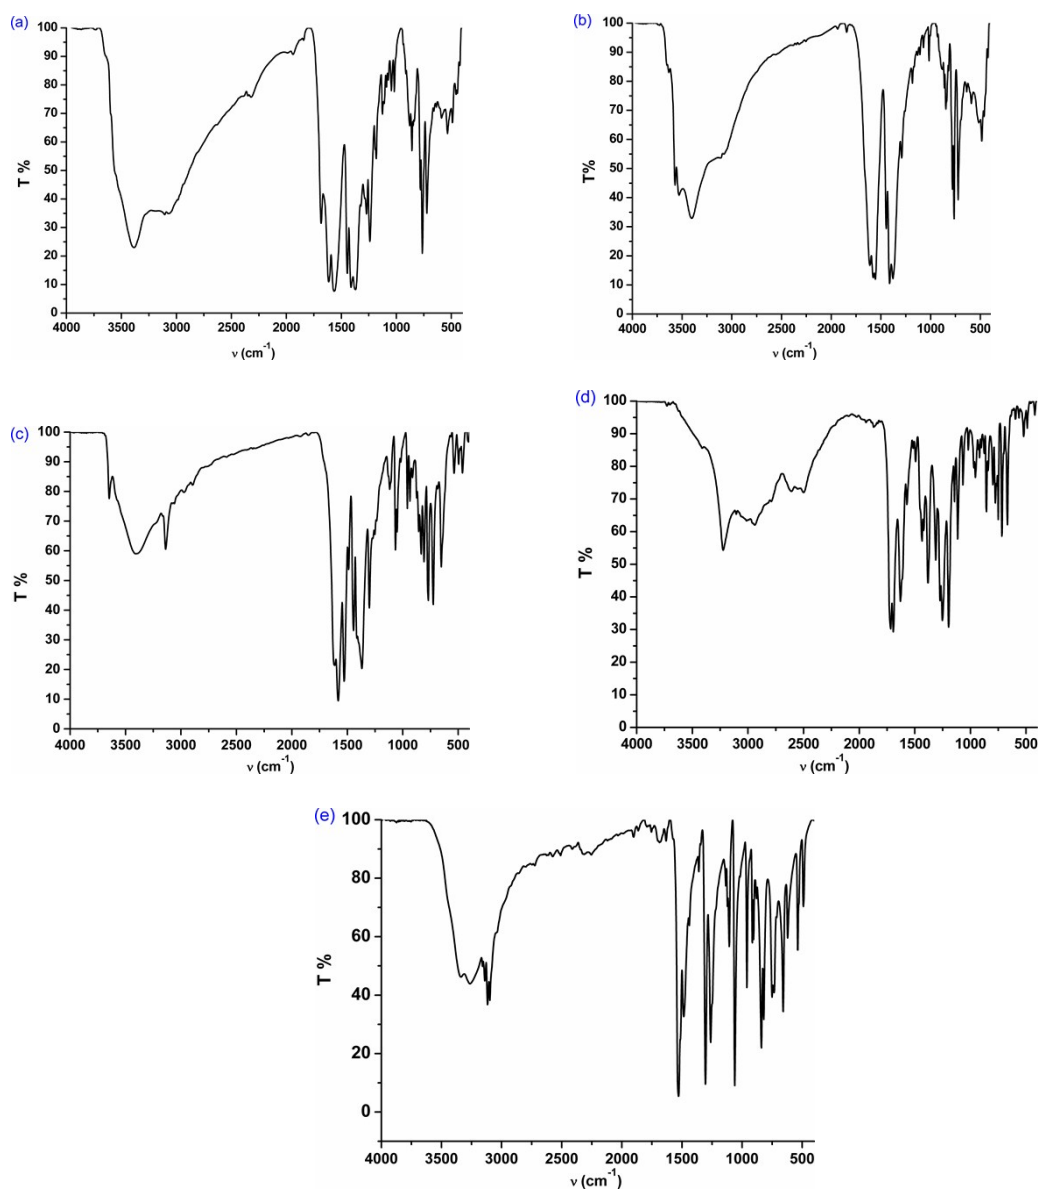

**Fig. S1** The IR spectra of **1** (a), **2** (b) and **3** (c), H<sub>3</sub>BPT(d) and 1,4-bib (e).

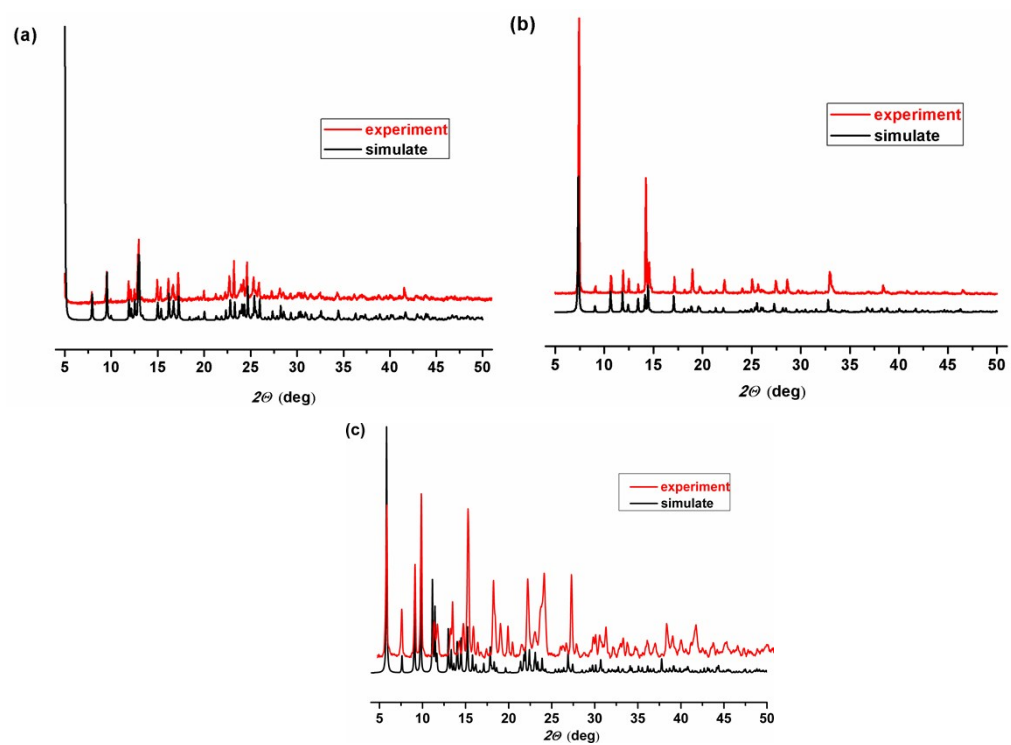

**Fig. S2** Comparison of the simulated and experimental PXRD patterns of **1** (a), **2** (b) and **3** (c).
